# Supplementary material for: A new species of Cordyligaster Macquart, reared from caterpillars in Area de Conservacion Guanacaste, northwestern Costa Rica
Source: PubMed Central journal article supplement (PMC4266961; doi:10.3897/bdj.2.e4174), 2014-11-24
Supplement: biodiversity_data_journal-2-e4174-s001.pdf [file biodiversity_data_journal-2-e4174-s001.pdf]

# BOLD TaxonID Tree

Title : SEARCH: Marker(COI-5P), Sample ids(41 ids) [SEARCH1]  
Date : 7-October-2014  
Data Type : Nucleotide  
Distance Model : Kimura 2 Parameter  
Marker : COI-5P  
Codon Positions : 1st, 2nd, 3rd  
Labels : Extra Info, SampleID, Sequence Length  
Filters : Length > 200  
Colorization : [blue]=Stop Codons [red]=Contamination or misidentification  
Attachment : Photographs & Spreadsheet

Sequence Count : 41  
Species count : 3  
Genus count : 1  
Family count : 1  
Unidentified : 0

1%

Cordyligaster capelli[1][DHJPAR0006943|614[2n]bp|Syngamia florella

Cordyligaster capelli[2][DHJPAR0006938|657[0n]bp|Syngamia florella

Cordyligaster capelli[3][DHJPAR0006940|645[0n]bp|Syngamia florella

Cordyligaster capelli[4][DHJPAR0006944|645[0n]bp|Syngamia florella

Cordyligaster capelli[5][DHJPAR0050661|658[1n]bp|Syngamia florella

Cordyligaster capelli[6][DHJPAR0006941|645[0n]bp|Syngamia florella

Cordyligaster capelli[7][DHJPAR0006939|645[0n]bp|Syngamia florella

Cordyligaster capelli[8][DHJPAR0006946|645[1n]bp|Syngamia florella

Cordyligaster capelli[9][DHJPAR0006942|645[2n]bp|Syngamia florella

Cordyligaster capelli[10][DHJPAR0006945|657[2n]bp|Syngamia florella

Cordyligaster capelli[11][DHJPAR0055082|658[0n]bp|Syngamia florella

Cordyligaster fuscipennis[12][DHJPAR0006724|658[0n]bp|Pantographa expansalis

Cordyligaster fuscipennis[13][DHJPAR0051626|658[0n]bp|Pantographa expansalis

Cordyligaster fuscipennis[14][DHJPAR0051625|658[0n]bp|Pantographa expansalis

Cordyligaster fuscipennis[15][DHJPAR0010208|657[0n]bp|Pleuroptya Solis03

Cordyligaster fuscipennis[16][DHJPAR0006937|657[0n]bp|Pleuroptya Solis03

Cordyligaster fuscipennis[17][DHJPAR0010199|657[1n]bp|Pleuroptya Solis03

Cordyligaster fuscipennis[18][DHJPAR0010200|657[1n]bp|Pleuroptya Solis03

Cordyligaster fuscipennis[19][DHJPAR0006723|658[0n]bp|Pantographa expansalis

Cordyligaster fuscipennis[20][DHJPAR0006935|657[0n]bp|Pantographa expansalis

Cordyligaster fuscipennis[21][DHJPAR0010209|657[1n]bp|Pleuroptya Solis03

Cordyligaster fuscipennis[22][DHJPAR0030037|657[0n]bp|Pleuroptya Solis03

Cordyligaster fuscipennis[23][DHJPAR0030462|658[0n]bp|Pleuroptya Solis03

Cordyligaster fuscipennis[24][DHJPAR0050731|661[0n]bp|Pantographa expansalis

Cordyligaster fuscipennis[25][DHJPAR0006936|645[0n]bp|Pleuroptya Solis03

Cordyligaster fuscipennis[26][DHJPAR0010202|643[3n]bp|Pleuroptya Solis03

Cordyligaster fuscipennis[27][DHJPAR0010205|644[1n]bp|Pleuroptya Solis03

Cordyligaster fuscipennis[28][DHJPAR0010206|657[0n]bp|Pleuroptya Solis03

Cordyligaster fuscipennis[29][DHJPAR0010213|657[0n]bp|Pleuroptya Solis03

Cordyligaster fuscipennis[30][DHJPAR0030038|657[0n]bp|Pleuroptya Solis03

Cordyligaster fuscipennis[31][DHJPAR0030463|658[0n]bp|Pleuroptya Solis03

Cordyligaster fuscipennis[32][DHJPAR0038713|658[0n]bp|Pleuroptya Solis03

Cordyligaster fuscipennis[33][DHJPAR0030039|657[0n]bp|Pleuroptya Solis03

Cordyligaster fuscipennis[34][DHJPAR0030036|657[0n]bp|Pleuroptya Solis03

Cordyligaster fuscipennis[35][DHJPAR0010207|657[0n]bp|Pleuroptya Solis03

Cordyligaster fuscipennis[36][DHJPAR0010210|638[1n]bp|Pleuroptya Solis03

Cordyligaster fuscipennis[37][DHJPAR0010212|631[1n]bp|Pleuroptya Solis03

Cordyligaster fuscipennis[38][DHJPAR0019634|648[0n]bp|Pantographa expansalis

Cordyligaster fuscipennis[39][DHJPAR0010201|606[2n]bp|Pleuroptya Solis03

Cordyligaster fuscipennis[40][DHJPAR0006720|658[1n]bp|Pantographa expansalis

Cordyligaster fuscipennis[41][DHJPAR0037670|658[0n]bp|Pantographa expansalis
