# Supplementary material for: A new species of Cordyligaster Macquart, reared from caterpillars in Area de Conservacion Guanacaste, northwestern Costa Rica
Source: Biodivers Data J. 2014 Nov 24;(2):e4174. doi: 10.3897/BDJ.2.e4174 (PMC4266961; doi:10.3897/BDJ.2.e4174)
Supplement: Supplementary material 2 — Cordyligaster exel 7Oct14 [file biodiversity_data_journal-2-e4174-s002.xls]

Tree Order	Processid	Sampleid	Phylum	Class	Order	Family	Subfamily	Genus	Species				Depository	Project Manager
2	ASTAV180-06	DHJPAR0006938	Arthropoda	Insecta	Diptera	Tachinidae	Dexiinae	Cordyligaster	Cordyligaster capelli				"Canadian National Collection of Insects, Arachnids and Nematodes"	Alex Smith
7	ASTAV181-06	DHJPAR0006939	Arthropoda	Insecta	Diptera	Tachinidae	Dexiinae	Cordyligaster	Cordyligaster capelli				"Canadian National Collection of Insects, Arachnids and Nematodes"	Alex Smith
3	ASTAV182-06	DHJPAR0006940	Arthropoda	Insecta	Diptera	Tachinidae	Dexiinae	Cordyligaster	Cordyligaster capelli				"Canadian National Collection of Insects, Arachnids and Nematodes"	Alex Smith
6	ASTAV183-06	DHJPAR0006941	Arthropoda	Insecta	Diptera	Tachinidae	Dexiinae	Cordyligaster	Cordyligaster capelli				"Canadian National Collection of Insects, Arachnids and Nematodes"	Alex Smith
9	ASTAV184-06	DHJPAR0006942	Arthropoda	Insecta	Diptera	Tachinidae	Dexiinae	Cordyligaster	Cordyligaster capelli				"Canadian National Collection of Insects, Arachnids and Nematodes"	Alex Smith
1	ASTAV185-06	DHJPAR0006943	Arthropoda	Insecta	Diptera	Tachinidae	Dexiinae	Cordyligaster	Cordyligaster capelli				"Canadian National Collection of Insects, Arachnids and Nematodes"	Alex Smith
4	ASTAV186-06	DHJPAR0006944	Arthropoda	Insecta	Diptera	Tachinidae	Dexiinae	Cordyligaster	Cordyligaster capelli				"Canadian National Collection of Insects, Arachnids and Nematodes"	Alex Smith
10	ASTAV187-06	DHJPAR0006945	Arthropoda	Insecta	Diptera	Tachinidae	Dexiinae	Cordyligaster	Cordyligaster capelli				"Canadian National Collection of Insects, Arachnids and Nematodes"	Alex Smith
8	ASTAV188-06	DHJPAR0006946	Arthropoda	Insecta	Diptera	Tachinidae	Dexiinae	Cordyligaster	Cordyligaster capelli				"Canadian National Collection of Insects, Arachnids and Nematodes"	Alex Smith
5	ACGBA3253-13	DHJPAR0050661	Arthropoda	Insecta	Diptera	Tachinidae	Dexiinae	Cordyligaster	Cordyligaster capelli				"Canadian National Collection of Insects, Arachnids and Nematodes"	Alex Smith
40	ASTA898-06	DHJPAR0006720	Arthropoda	Insecta	Diptera	Tachinidae	Dexiinae	Cordyligaster	Cordyligaster fuscipennis				"Canadian National Collection of Insects, Arachnids and Nematodes"	Alex Smith
19	ASTA901-06	DHJPAR0006723	Arthropoda	Insecta	Diptera	Tachinidae	Dexiinae	Cordyligaster	Cordyligaster fuscipennis				"Canadian National Collection of Insects, Arachnids and Nematodes"	Alex Smith
12	ASTA902-06	DHJPAR0006724	Arthropoda	Insecta	Diptera	Tachinidae	Dexiinae	Cordyligaster	Cordyligaster fuscipennis				"Canadian National Collection of Insects, Arachnids and Nematodes"	Alex Smith
20	ASTAV177-06	DHJPAR0006935	Arthropoda	Insecta	Diptera	Tachinidae	Dexiinae	Cordyligaster	Cordyligaster fuscipennis				"Canadian National Collection of Insects, Arachnids and Nematodes"	Alex Smith
25	ASTAV178-06	DHJPAR0006936	Arthropoda	Insecta	Diptera	Tachinidae	Dexiinae	Cordyligaster	Cordyligaster fuscipennis				"Canadian National Collection of Insects, Arachnids and Nematodes"	Alex Smith
16	ASTAV179-06	DHJPAR0006937	Arthropoda	Insecta	Diptera	Tachinidae	Dexiinae	Cordyligaster	Cordyligaster fuscipennis				"Canadian National Collection of Insects, Arachnids and Nematodes"	Alex Smith
17	ASTAV725-06	DHJPAR0010199	Arthropoda	Insecta	Diptera	Tachinidae	Dexiinae	Cordyligaster	Cordyligaster fuscipennis				"Canadian National Collection of Insects, Arachnids and Nematodes"	Alex Smith
18	ASTAV726-06	DHJPAR0010200	Arthropoda	Insecta	Diptera	Tachinidae	Dexiinae	Cordyligaster	Cordyligaster fuscipennis				"Canadian National Collection of Insects, Arachnids and Nematodes"	Alex Smith
39	ASTAV727-06	DHJPAR0010201	Arthropoda	Insecta	Diptera	Tachinidae	Dexiinae	Cordyligaster	Cordyligaster fuscipennis				"Canadian National Collection of Insects, Arachnids and Nematodes"	Alex Smith
26	ASTAV728-06	DHJPAR0010202	Arthropoda	Insecta	Diptera	Tachinidae	Dexiinae	Cordyligaster	Cordyligaster fuscipennis				"Canadian National Collection of Insects, Arachnids and Nematodes"	Alex Smith
27	ASTAV731-06	DHJPAR0010205	Arthropoda	Insecta	Diptera	Tachinidae	Dexiinae	Cordyligaster	Cordyligaster fuscipennis				"Canadian National Collection of Insects, Arachnids and Nematodes"	Alex Smith
28	ASTAV732-06	DHJPAR0010206	Arthropoda	Insecta	Diptera	Tachinidae	Dexiinae	Cordyligaster	Cordyligaster fuscipennis				"Canadian National Collection of Insects, Arachnids and Nematodes"	Alex Smith
35	ASTAV733-06	DHJPAR0010207	Arthropoda	Insecta	Diptera	Tachinidae	Dexiinae	Cordyligaster	Cordyligaster fuscipennis				"Canadian National Collection of Insects, Arachnids and Nematodes"	Alex Smith
15	ASTAV734-06	DHJPAR0010208	Arthropoda	Insecta	Diptera	Tachinidae	Dexiinae	Cordyligaster	Cordyligaster fuscipennis				"Canadian National Collection of Insects, Arachnids and Nematodes"	Alex Smith
21	ASTAV735-06	DHJPAR0010209	Arthropoda	Insecta	Diptera	Tachinidae	Dexiinae	Cordyligaster	Cordyligaster fuscipennis				"Canadian National Collection of Insects, Arachnids and Nematodes"	Alex Smith
36	ASTAV736-06	DHJPAR0010210	Arthropoda	Insecta	Diptera	Tachinidae	Dexiinae	Cordyligaster	Cordyligaster fuscipennis				"Canadian National Collection of Insects, Arachnids and Nematodes"	Alex Smith
37	ASTAV738-06	DHJPAR0010212	Arthropoda	Insecta	Diptera	Tachinidae	Dexiinae	Cordyligaster	Cordyligaster fuscipennis				"Canadian National Collection of Insects, Arachnids and Nematodes"	Alex Smith
29	ASTAV739-06	DHJPAR0010213	Arthropoda	Insecta	Diptera	Tachinidae	Dexiinae	Cordyligaster	Cordyligaster fuscipennis				"Canadian National Collection of Insects, Arachnids and Nematodes"	Alex Smith
38	ASTAB182-07	DHJPAR0019634	Arthropoda	Insecta	Diptera	Tachinidae	Dexiinae	Cordyligaster	Cordyligaster fuscipennis				"Canadian National Collection of Insects, Arachnids and Nematodes"	Alex Smith
34	ASHYB780-09	DHJPAR0030036	Arthropoda	Insecta	Diptera	Tachinidae	Dexiinae	Cordyligaster	Cordyligaster fuscipennis				"Canadian National Collection of Insects, Arachnids and Nematodes"	Alex Smith
22	ASHYB781-09	DHJPAR0030037	Arthropoda	Insecta	Diptera	Tachinidae	Dexiinae	Cordyligaster	Cordyligaster fuscipennis				"Canadian National Collection of Insects, Arachnids and Nematodes"	Alex Smith
30	ASHYB782-09	DHJPAR0030038	Arthropoda	Insecta	Diptera	Tachinidae	Dexiinae	Cordyligaster	Cordyligaster fuscipennis				"Canadian National Collection of Insects, Arachnids and Nematodes"	Alex Smith
33	ASHYB783-09	DHJPAR0030039	Arthropoda	Insecta	Diptera	Tachinidae	Dexiinae	Cordyligaster	Cordyligaster fuscipennis				"Canadian National Collection of Insects, Arachnids and Nematodes"	Alex Smith
23	ASHYB1205-09	DHJPAR0030462	Arthropoda	Insecta	Diptera	Tachinidae	Dexiinae	Cordyligaster	Cordyligaster fuscipennis				"Canadian National Collection of Insects, Arachnids and Nematodes"	Alex Smith
31	ASHYB1206-09	DHJPAR0030463	Arthropoda	Insecta	Diptera	Tachinidae	Dexiinae	Cordyligaster	Cordyligaster fuscipennis				"Canadian National Collection of Insects, Arachnids and Nematodes"	Alex Smith
41	ASHYC4415-10	DHJPAR0037670	Arthropoda	Insecta	Diptera	Tachinidae	Dexiinae	Cordyligaster	Cordyligaster fuscipennis				"Canadian National Collection of Insects, Arachnids and Nematodes"	Alex Smith
32	ASHYD2286-10	DHJPAR0038713	Arthropoda	Insecta	Diptera	Tachinidae	Dexiinae	Cordyligaster	Cordyligaster fuscipennis				"Canadian National Collection of Insects, Arachnids and Nematodes"	Alex Smith
24	ACGBA3323-13	DHJPAR0050731	Arthropoda	Insecta	Diptera	Tachinidae	Dexiinae	Cordyligaster	Cordyligaster fuscipennis				"Canadian National Collection of Insects, Arachnids and Nematodes"	Alex Smith
14	ACGBA4217-13	DHJPAR0051625	Arthropoda	Insecta	Diptera	Tachinidae	Dexiinae	Cordyligaster	Cordyligaster fuscipennis				"Canadian National Collection of Insects, Arachnids and Nematodes"	Alex Smith
13	ACGBA4218-13	DHJPAR0051626	Arthropoda	Insecta	Diptera	Tachinidae	Dexiinae	Cordyligaster	Cordyligaster fuscipennis				"Canadian National Collection of Insects, Arachnids and Nematodes"	Alex Smith
11	ASHYH1629-14	DHJPAR0055082	Arthropoda	Insecta	Diptera	Tachinidae	Dexiinae	Cordyligaster	Cordyligaster capelli				University of Pennsylvania	Alex Smith
